# Supplementary material
Source: Springer Nature journal article supplement (https://springermedizin.de/resource/supplementary/13063_2011_652_MOESM1_ESM.pdf/9618420)

Moderators

Cognitive Reserve  
Education, Occupation  
& Leisure Activity  
ApoE Status

+/-

Intervention

Cognitive Simulation  
(RESERVE-DSD)

+

Primary Outcomes

↑ Cognitive Function  
Attention  
Orientation  
Memory  
Abstract Thinking  
Ex. Function

↓ DSD:  
Duration & Severity

↑ Physical Function

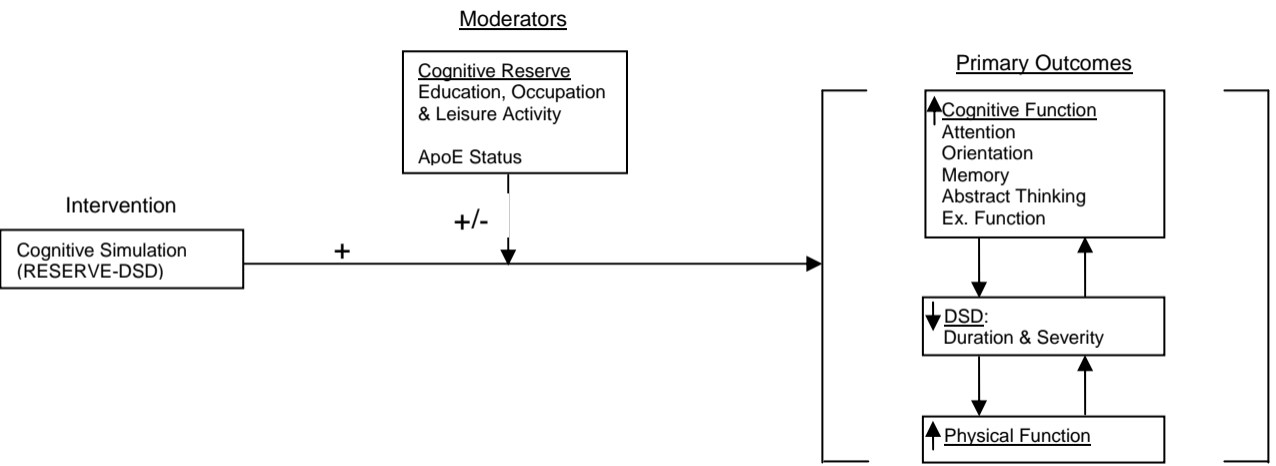

Supplement: MOESM1 [file 9618420]
